# Supplementary material
Source: HighWire-hosted journal article supplement (http://www.jneurosci.org/highwire/filestream/599066/field_highwire_adjunct_files/2/Supplementary_Fig2.pdf)
Supplement: Supplementary_Fig2.pdf [file Supplementary_Fig2.pdf]

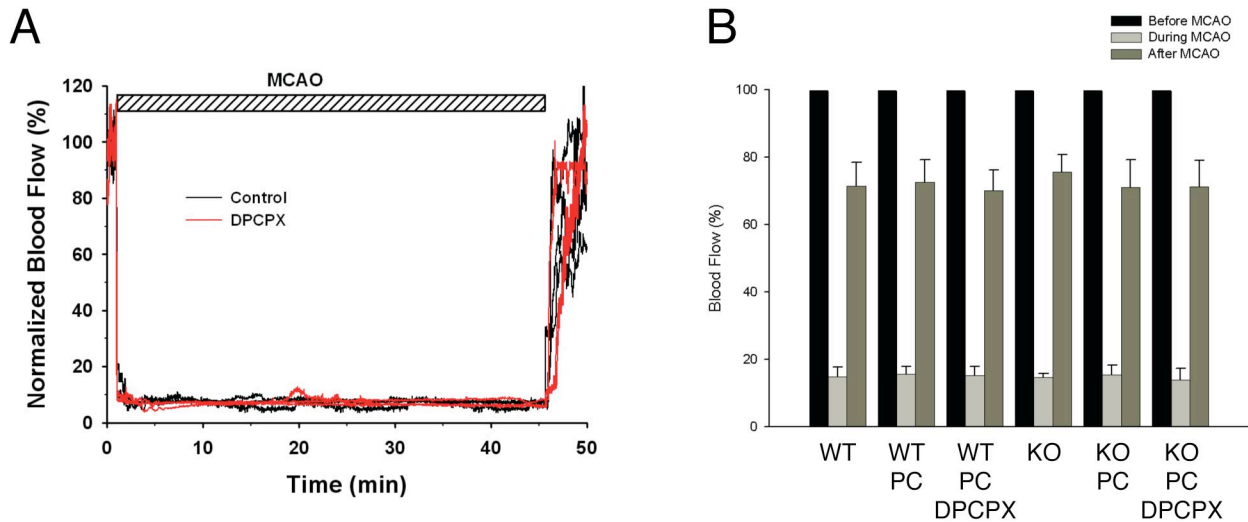

Supplementary Fig. 2

MCA occlusion is associated with a comparable fall in cerebral perfusion in all groups studied. (A) Histogram mapping the relative decrease in perfusion during 45 min MCA occlusion and recovery at 10 min after reperfusion (55 min after initiation of MCA occlusion) detected by laser doppler flowcytometry. (B) No significant differences in blood flow were noted among the groups studied. Data represent average  $\pm$  SE (n=5-8).
